# Supplementary material for: Spatial Dynamic Models for Assessing the Impact of Public Policies: The Case of Unified Educational Centers in the Periphery of São Paulo City
Source: MDPI journal article supplement (doi:10.3390/land11060922), 2022-06-16
Supplement: s1 [file s1]

Supplementary Material

# Spatial dynamic models for assessing the impact of public policies: the case of unified educational centers in the periphery of São Paulo city

Pedro Bueno Rocha Campos<sup>1\*</sup>, Cláudia Maria de Almeida<sup>2</sup>, and Alfredo Pereira de Queiroz<sup>1</sup>

<sup>1</sup> University of São Paulo (USP), Geography Department, São Paulo 05508-000, Brazil; pbrcampos@alumni.usp.br; aqueiroz@usp.br

<sup>2</sup> National Institute for Space Research (INPE), São José dos Campos 12227-010, Brazil; claudia.almeida@inpe.br

\* Correspondence: pbrcampos@alumni.usp.br

## Supplementary Material: Transition matrices

**Table S1.** CEU Alvarenga global transitions rates for the 1st and 2nd simulation periods.

| Transitions 2000–2004 |              |                       |         | Transitions 2004–2010 |                 |                      |         |
|-----------------------|--------------|-----------------------|---------|-----------------------|-----------------|----------------------|---------|
| CEU                   | From         | To                    | Rate    | CEU                   | From            | To                   | Rate    |
| Alvarenga             | Vacant Plots | Residential Use       | 0.01208 | Alvarenga             | Tree Vegetation | Informal Settlements | 0.01924 |
| Alvarenga             | Vacant Plots | Institutional Use     | 0.00659 | Alvarenga             | Vacant Plots    | Residential Use      | 0.02606 |
| Alvarenga             | Vacant Plots | Commerce and Services | 0.02437 | Alvarenga             | Vacant Plots    | Informal Settlements | 0.02501 |

**Table S2.** CEU Butantã global transitions rates for the 1st and 2nd simulation periods.

| Transitions 2000–2004 |                      |                       |         | Transitions 2004–2010 |                       |                       |          |
|-----------------------|----------------------|-----------------------|---------|-----------------------|-----------------------|-----------------------|----------|
| CEU                   | From                 | To                    | Rate    | CEU                   | From                  | To                    | Rate     |
| Butantã               | Informal Settlements | Vacant Plots          | 0.01429 | Butantã               | Tree Vegetation       | Residential Use       | 0.028388 |
| Butantã               | Vacant Plots         | Residential Use       | 0.01181 | Butantã               | Residential Use       | Institutional Use     | 0.001268 |
| Butantã               | Vacant Plots         | Informal Settlements  | 0.02594 | Butantã               | Informal Settlements  | Vacant Plots          | 0.014112 |
| Butantã               | Vacant Plots         | Institutional Use     | 0.00780 | Butantã               | Vacant Plots          | Residential Use       | 0.19953  |
| Butantã               | Vacant Plots         | Commerce and Services | 0.03165 | Butantã               | Vacant Plots          | Informal Settlements  | 0.010852 |
|                       |                      |                       |         | Butantã               | Vacant Plots          | Institutional Use     | 0.089622 |
|                       |                      |                       |         | Butantã               | Vacant Plots          | Commerce and Services | 0.001679 |
|                       |                      |                       |         | Butantã               | Institutional Use     | Residential Use       | 0.00792  |
|                       |                      |                       |         | Butantã               | Commerce and Services | Residential Use       | 0.038424 |
|                       |                      |                       |         | Butantã               | Commerce and Services | Vacant Plots          | 0.008181 |

**Table S3.** CEU Campo Limpo global transitions rates for the 1st and 2nd simulation periods.

| Transitions 2000–2004 |              |                       |          | Transitions 2004–2010 |                      |                       |          |
|-----------------------|--------------|-----------------------|----------|-----------------------|----------------------|-----------------------|----------|
| CEU                   | From         | To                    | Rate     | CEU                   | From                 | To                    | Rate     |
| Campo Limpo           | Vacant Plots | Residential Use       | 0.056166 | Campo Limpo           | Informal Settlements | Residential Use       | 0.018546 |
| Campo Limpo           | Vacant Plots | Informal Settlements  | 0.00854  | Campo Limpo           | Vacant Plots         | Residential Use       | 0.073832 |
| Campo Limpo           | Vacant Plots | Commerce and Services | 0.020405 | Campo Limpo           | Vacant Plots         | Informal Settlements  | 0.132078 |
|                       |              |                       |          | Campo Limpo           | Vacant Plots         | Institutional Use     | 0.069982 |
|                       |              |                       |          | Campo Limpo           | Vacant Plots         | Commerce and Services | 0.033157 |

**Table S4.** CEU Feitiço da Vila global transitions rates for the 1st and 2nd simulation periods.

| Transitions 2000–2004 |                      |                       |          | Transitions 2004–2010 |                      |                   |         |
|-----------------------|----------------------|-----------------------|----------|-----------------------|----------------------|-------------------|---------|
| CEU                   | From                 | To                    | Rate     | CEU                   | From                 | To                | Rate    |
| Feitiço da Vila       | Tree Vegetation      | Informal Settlements  | 0.05034  | Feitiço da Vila       | Informal Settlements | Residential Use   | 0.04776 |
| Feitiço da Vila       | Informal Settlements | Residential Use       | 0.00551  | Feitiço da Vila       | Informal Settlements | Vacant Plots      | 0.00561 |
| Feitiço da Vila       | Informal Settlements | Vacant Plots          | 0.00369  | Feitiço da Vila       | Vacant Plots         | Residential Use   | 0.01232 |
| Feitiço da Vila       | Vacant Plots         | Residential Use       | 0.00426  | Feitiço da Vila       | Vacant Plots         | Institutional Use | 0.00397 |
| Feitiço da Vila       | Vacant Plots         | Informal Settlements  | 0.027395 |                       |                      |                   |         |
| Feitiço da Vila       | Vacant Plots         | Institutional Use     | 0.005873 |                       |                      |                   |         |
| Feitiço da Vila       | Vacant Plots         | Commerce and Services | 0.006843 |                       |                      |                   |         |

**Table S5.** CEU Inácio Monteiro global transitions rates for the 1st and 2nd simulation periods.

| Transitions 2000–2004 |                 |                       |         | Transitions 2004–2010 |                       |                       |         |
|-----------------------|-----------------|-----------------------|---------|-----------------------|-----------------------|-----------------------|---------|
| CEU                   | From            | To                    | Rate    | CEU                   | From                  | To                    | Rate    |
| Inácio Monteiro       | Tree Vegetation | Residential Use       | 0.00377 | Inácio Monteiro       | Informal Settlements  | Residential Use       | 0.08329 |
| Inácio Monteiro       | Vacant Plots    | Residential Use       | 0.09927 | Inácio Monteiro       | Informal Settlements  | Vacant Plots          | 0.07280 |
| Inácio Monteiro       | Vacant Plots    | Informal Settlements  | 0.00667 | Inácio Monteiro       | Vacant Plots          | Residential Use       | 0.05814 |
| Inácio Monteiro       | Vacant Plots    | Institutional Use     | 0.00604 | Inácio Monteiro       | Vacant Plots          | Informal Settlements  | 0.01512 |
| Inácio Monteiro       | Vacant Plots    | Commerce and Services | 0.00267 | Inácio Monteiro       | Vacant Plots          | Institutional Use     | 0.04027 |
|                       |                 |                       |         | Inácio Monteiro       | Vacant Plots          | Commerce and Services | 0.02022 |
|                       |                 |                       |         | Inácio Monteiro       | Commerce and Services | Vacant Plots          | 0.00026 |

**Table S6.** CEU Navegantes global transitions rates for the 1st and 2nd simulation periods.

| Transitions 2000–2004 |              |                       |         | Transitions 2004–2010 |                       |                       |         |
|-----------------------|--------------|-----------------------|---------|-----------------------|-----------------------|-----------------------|---------|
| CEU                   | From         | To                    | Rate    | CEU                   | From                  | To                    | Rate    |
| Navegantes            | Vacant Plots | Informal Settlements  | 0.00474 | Navegantes            | Informal Settlements  | Residential Use       | 0.03046 |
| Navegantes            | Vacant Plots | Institutional Use     | 0.01289 | Navegantes            | Informal Settlements  | Vacant Plots          | 0.02440 |
| Navegantes            | Vacant Plots | Commerce and Services | 0.02220 | Navegantes            | Vacant Plots          | Residential Use       | 0.00359 |
|                       |              |                       |         | Navegantes            | Vacant Plots          | Informal Settlements  | 0.00810 |
|                       |              |                       |         | Navegantes            | Vacant Plots          | Institutional Use     | 0.00878 |
|                       |              |                       |         | Navegantes            | Vacant Plots          | Commerce and Services | 0.00671 |
|                       |              |                       |         | Navegantes            | Commerce and Services | Vacant Plots          | 0.02986 |

**Table S7.** CEU Parque Veredas global transitions rates for the 1st and 2nd simulation periods.

| Transitions 2000–2004 |                      |                       |         | Transitions 2004–2010 |                       |                       |         |
|-----------------------|----------------------|-----------------------|---------|-----------------------|-----------------------|-----------------------|---------|
| CEU                   | From                 | To                    | Rate    | CEU                   | From                  | To                    | Rate    |
| Parque Veredas        | Informal Settlements | Residential Use       | 0.02133 | Parque Veredas        | Informal Settlements  | Residential Use       | 0.05744 |
| Parque Veredas        | Vacant Plots         | Residential Use       | 0.08787 | Parque Veredas        | Informal Settlements  | Vacant Plots          | 0.00167 |
| Parque Veredas        | Vacant Plots         | Informal Settlements  | 0.00393 | Parque Veredas        | Vacant Plots          | Residential Use       | 0.12246 |
| Parque Veredas        | Vacant Plots         | Institutional Use     | 0.01783 | Parque Veredas        | Vacant Plots          | Informal Settlements  | 0.02805 |
| Parque Veredas        | Vacant Plots         | Commerce and Services | 0.00120 | Parque Veredas        | Vacant Plots          | Institutional Use     | 0.06433 |
|                       |                      |                       |         | Parque Veredas        | Vacant Plots          | Industrial Use        | 0.01284 |
|                       |                      |                       |         | Parque Veredas        | Vacant Plots          | Commerce and Services | 0.03650 |
|                       |                      |                       |         | Parque Veredas        | Commerce and Services | Vacant Plots          | 0.01917 |

**Table S8.** CEU Paz global transitions rates for the 1st and 2nd simulation periods.

| Transitions 2000–2004 |                      |                       |         | Transitions 2004–2010 |                      |                      |         |
|-----------------------|----------------------|-----------------------|---------|-----------------------|----------------------|----------------------|---------|
| CEU                   | From                 | To                    | Rate    | CEU                   | From                 | To                   | Rate    |
| Paz                   | Tree Vegetation      | Informal Settlements  | 0.00357 | Paz                   | Tree Vegetation      | Informal Settlements | 0.00501 |
| Paz                   | Tree Vegetation      | Vacant Plots          | 0.01077 | Paz                   | Tree Vegetation      | Vacant Plots         | 0.00181 |
| Paz                   | Informal Settlements | Residential Use       | 0.00347 | Paz                   | Informal Settlements | Residential Use      | 0.01691 |
| Paz                   | Vacant Plots         | Informal Settlements  | 0.02051 | Paz                   | Informal Settlements | Vacant Plots         | 0.02964 |
| Paz                   | Vacant Plots         | Commerce and Services | 0.00179 | Paz                   | Vacant Plots         | Residential Use      | 0.01886 |
| Paz                   | Industrial Use       | Vacant Plots          | 0.13126 | Paz                   | Vacant Plots         | Informal Settlements | 0.04107 |
|                       |                      |                       |         | Paz                   | Vacant Plots         | Institutional Use    | 0.01265 |
|                       |                      |                       |         | Paz                   | Vacant Plots         | Industrial Use       | 0.01609 |
|                       |                      |                       |         | Paz                   | Industrial Use       | Vacant Plots         | 0.17387 |

**Table S9.** CEU Pêra Marmelo global transitions rates for the 1st and 2nd simulation periods.

| Transitions 2000–2004 |                      |                       |         | Transitions 2004–2010 |                       |                       |         |
|-----------------------|----------------------|-----------------------|---------|-----------------------|-----------------------|-----------------------|---------|
| CEU                   | From                 | To                    | Rate    | CEU                   | From                  | To                    | Rate    |
| Pêra Marmelo          | Tree Vegetation      | Informal Settlements  | 0.01064 | Pêra Marmelo          | Informal Settlements  | Residential Use       | 0.04678 |
| Pêra Marmelo          | Informal Settlements | Residential Use       | 0.26109 | Pêra Marmelo          | Informal Settlements  | Vacant Plots          | 0.06864 |
| Pêra Marmelo          | Informal Settlements | Vacant Plots          | 0.00971 | Pêra Marmelo          | Vacant Plots          | Residential Use       | 0.06417 |
| Pêra Marmelo          | Vacant Plots         | Residential Use       | 0.02886 | Pêra Marmelo          | Vacant Plots          | Informal Settlements  | 0.00206 |
| Pêra Marmelo          | Vacant Plots         | Informal Settlements  | 0.00409 | Pêra Marmelo          | Vacant Plots          | Institutional Use     | 0.01436 |
| Pêra Marmelo          | Vacant Plots         | Institutional Use     | 0.00777 | Pêra Marmelo          | Vacant Plots          | Commerce and Services | 0.00322 |
| Pêra Marmelo          | Vacant Plots         | Industrial Use        | 0.00240 | Pêra Marmelo          | Commerce and Services | Residential Use       | 0.02416 |
| Pêra Marmelo          | Vacant Plots         | Commerce and Services | 0.01438 |                       |                       |                       |         |

**Table S10.** CEU São Rafael global transitions rates for the 1st and 2nd simulation periods.

| Transitions 2000–2004 |                 |                      |         | Transitions 2004–2010 |                       |                       |         |
|-----------------------|-----------------|----------------------|---------|-----------------------|-----------------------|-----------------------|---------|
| CEU                   | From            | To                   | Rate    | CEU                   | From                  | To                    | Rate    |
| São Rafael            | Tree Vegetation | Vacant Plots         | 0.05982 | São Rafael            | Tree Vegetation       | Informal Settlements  | 0.00946 |
| São Rafael            | Residential Use | Informal Settlements | 0.00109 | São Rafael            | Tree Vegetation       | Vacant Plots          | 0.00341 |
| São Rafael            | Vacant Plots    | Residential Use      | 0.01206 | São Rafael            | Tree Vegetation       | Paved Roads           | 0.00364 |
| São Rafael            | Vacant Plots    | Informal Settlements | 0.01399 | São Rafael            | Residential Use       | Vacant Plots          | 0.00552 |
| São Rafael            | Vacant Plots    | Institutional Use    | 0.00168 | São Rafael            | Informal Settlements  | Tree Vegetation       | 0.00204 |
| São Rafael            | Vacant Plots    | Industrial Use       | 0.01572 | São Rafael            | Informal Settlements  | Residential Use       | 0.03303 |
|                       |                 |                      |         | São Rafael            | Informal Settlements  | Vacant Plots          | 0.07249 |
|                       |                 |                      |         | São Rafael            | Informal Settlements  | Paved Roads           | 0.01636 |
|                       |                 |                      |         | São Rafael            | Vacant Plots          | Tree Vegetation       | 0.01260 |
|                       |                 |                      |         | São Rafael            | Vacant Plots          | Residential Use       | 0.01251 |
|                       |                 |                      |         | São Rafael            | Vacant Plots          | Informal Settlements  | 0.04440 |
|                       |                 |                      |         | São Rafael            | Vacant Plots          | Institutional Use     | 0.00872 |
|                       |                 |                      |         | São Rafael            | Vacant Plots          | Paved Roads           | 0.05993 |
|                       |                 |                      |         | São Rafael            | Vacant Plots          | Industrial Use        | 0.01354 |
|                       |                 |                      |         | São Rafael            | Vacant Plots          | Commerce and Services | 0.00084 |
|                       |                 |                      |         | São Rafael            | Paved Roads           | Vacant Plots          | 0.00052 |
|                       |                 |                      |         | São Rafael            | Commerce and Services | Vacant Plots          | 0.03653 |

## Supplementary Material: Simulation results

Figure S1. Simulated and observed land use/land cover maps for the year 2004.

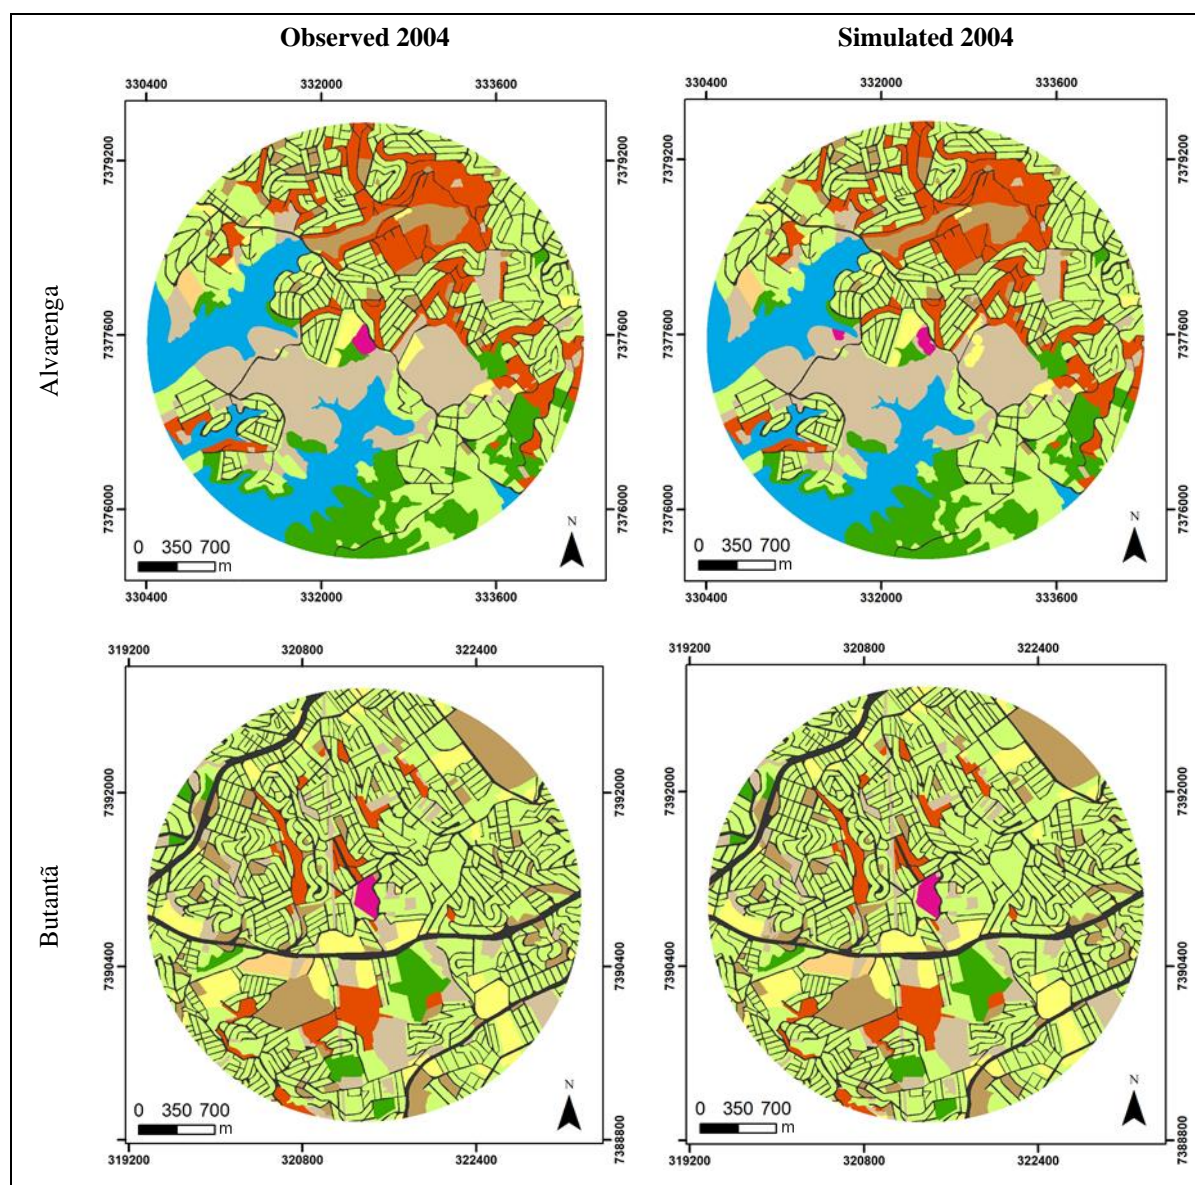



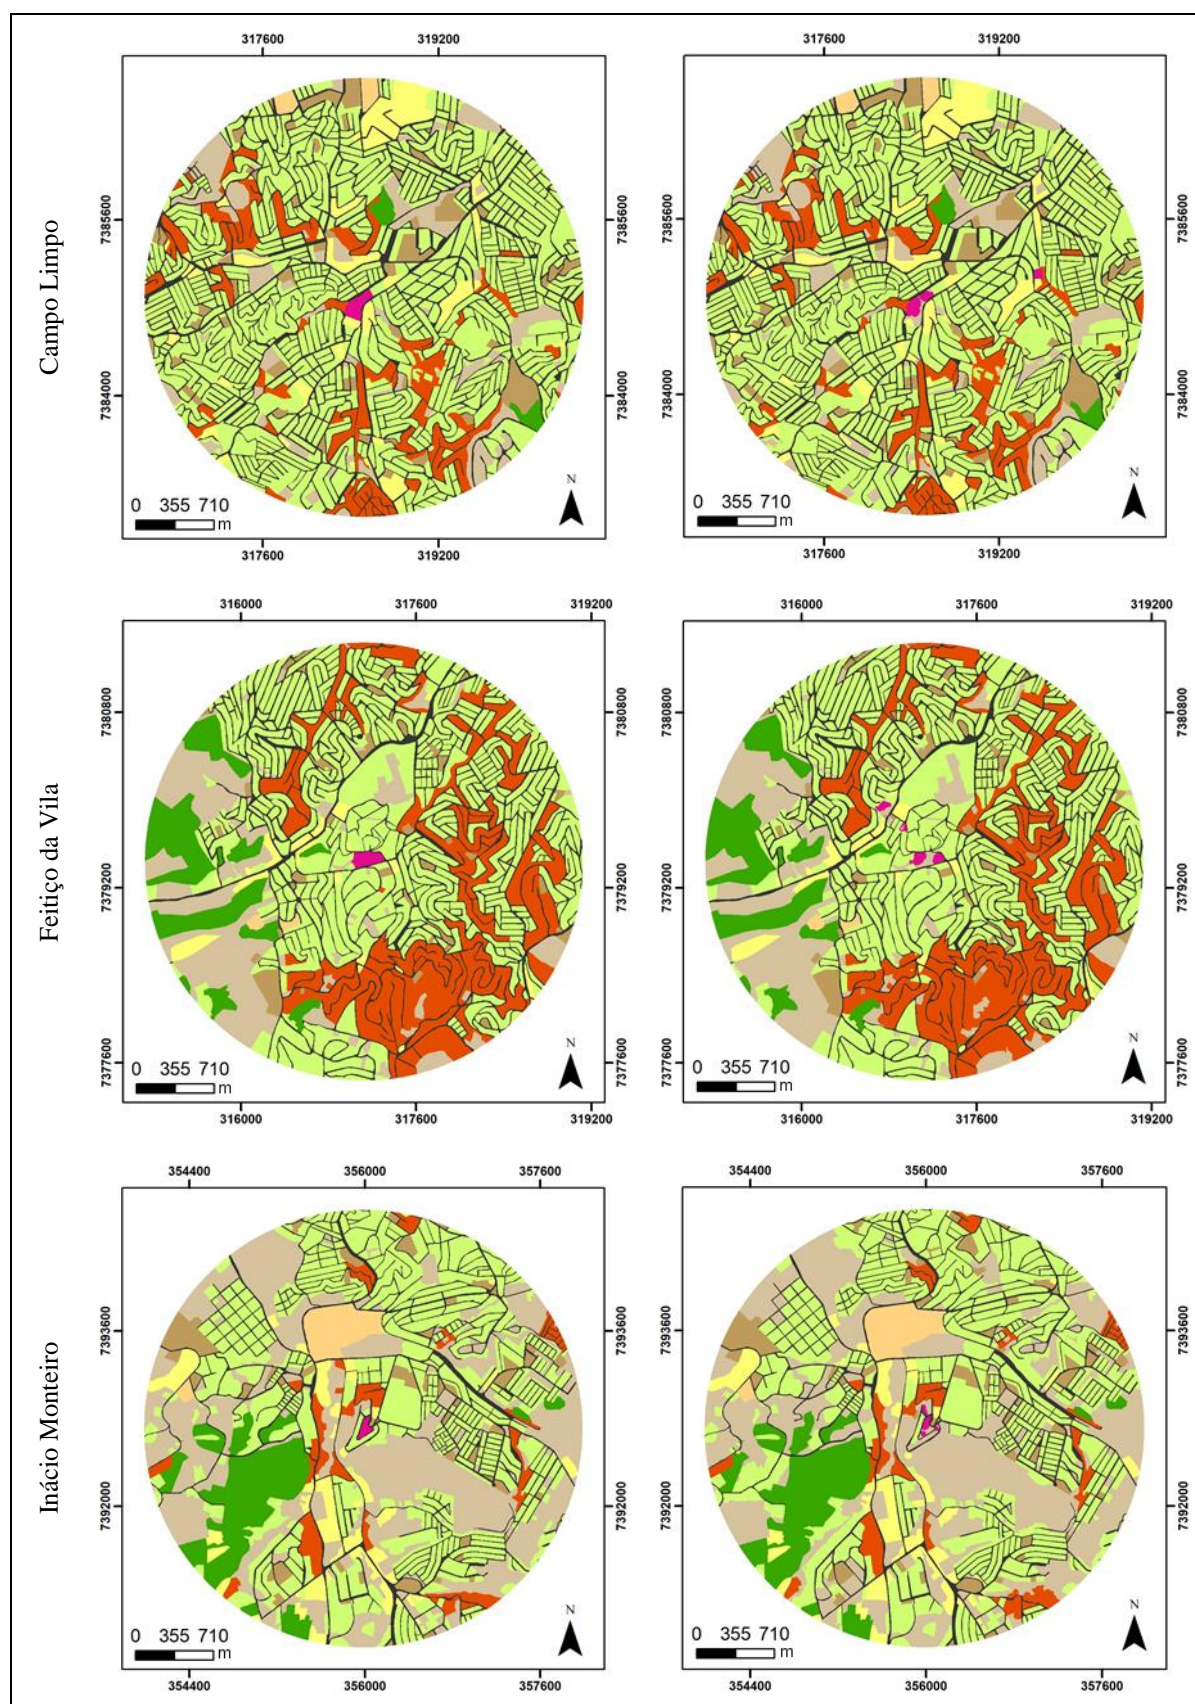



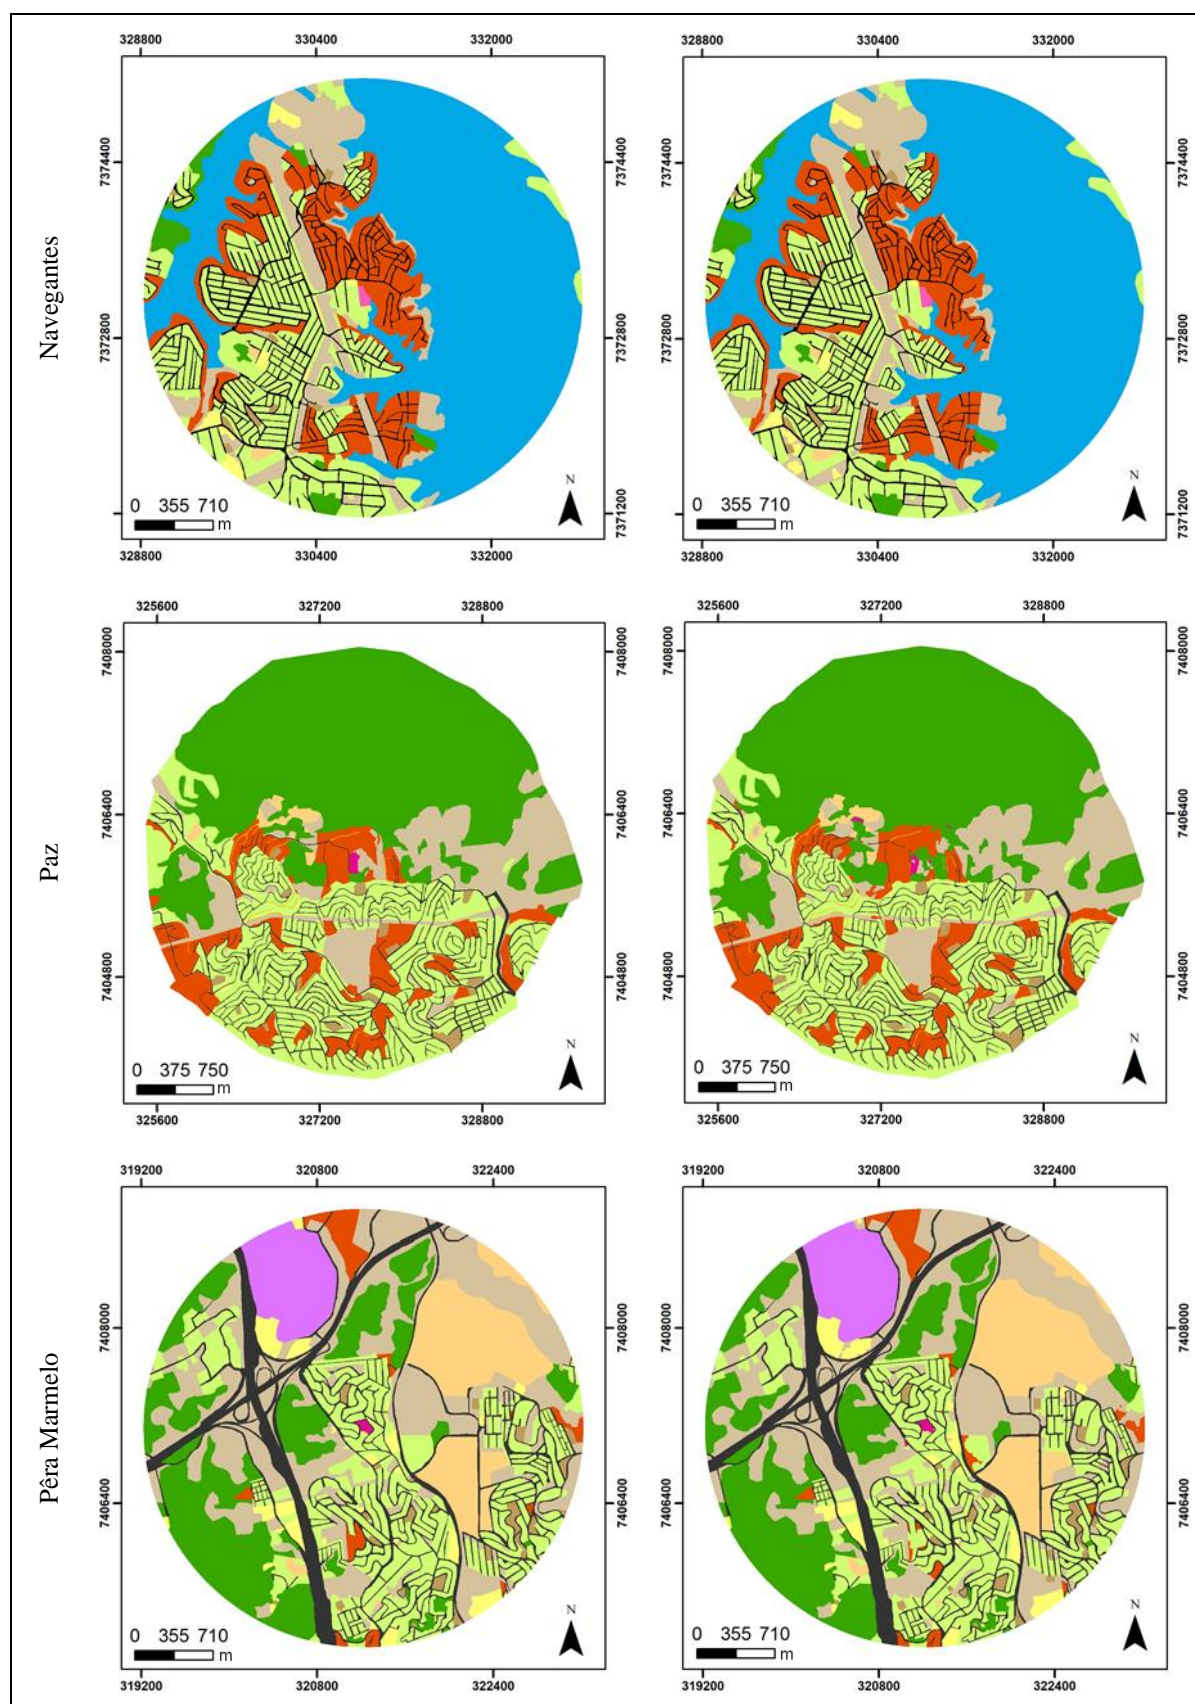

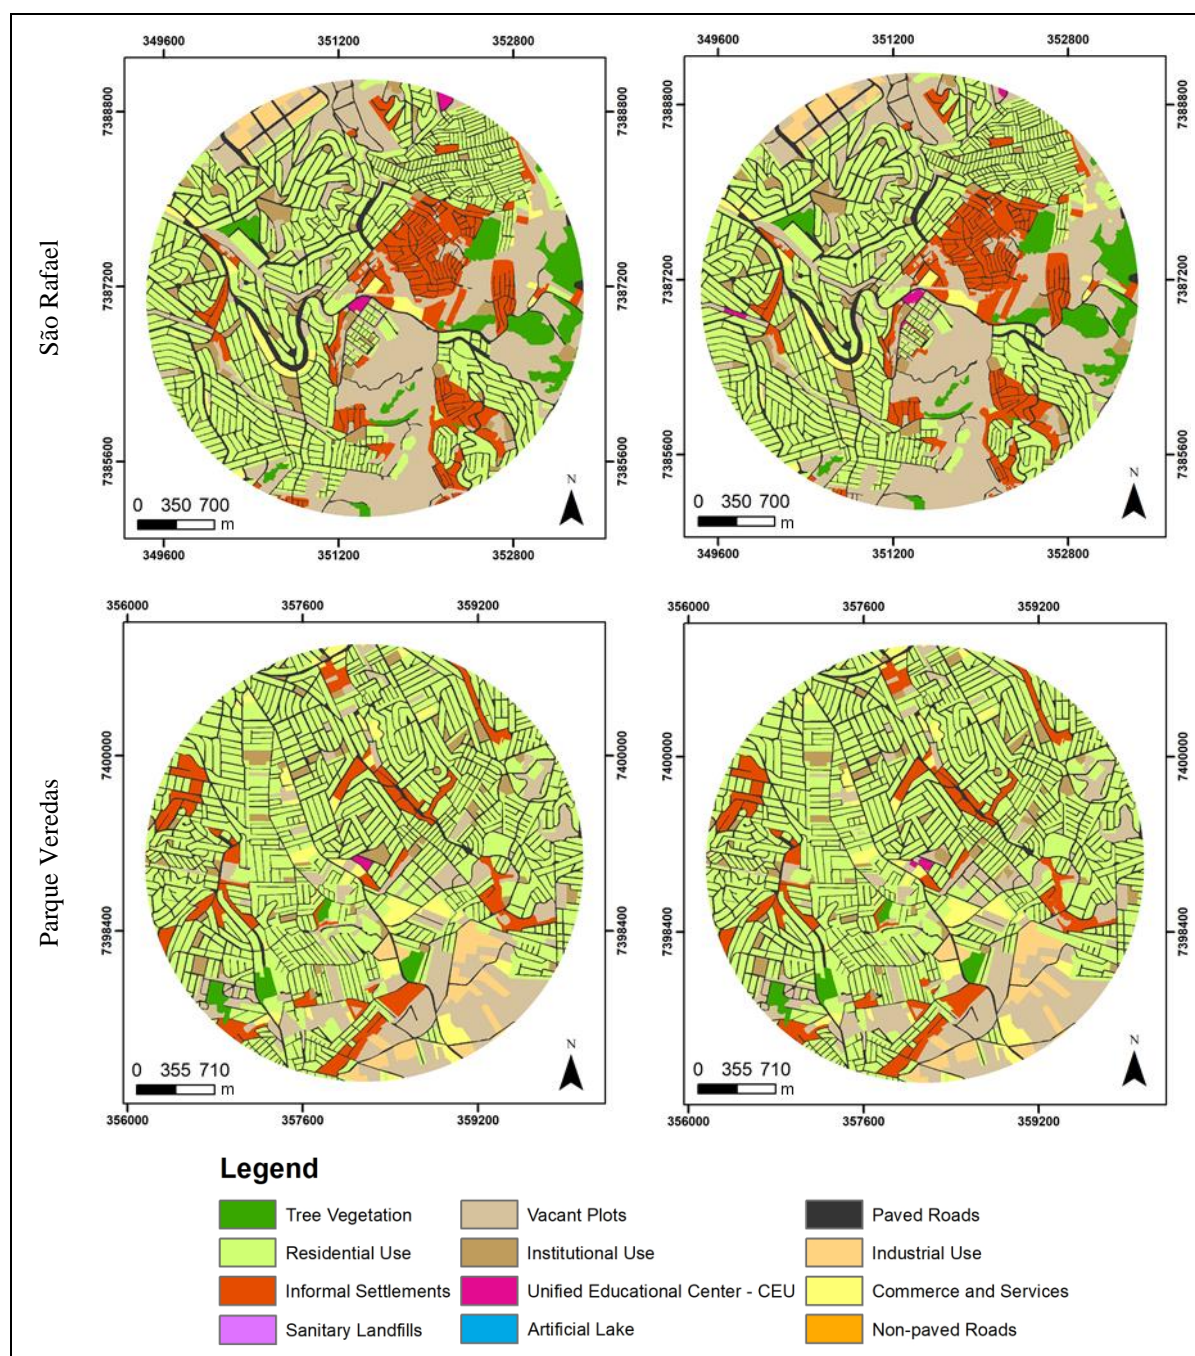



Figure S2. Simulated and observed land use/land cover maps for the year 2010.

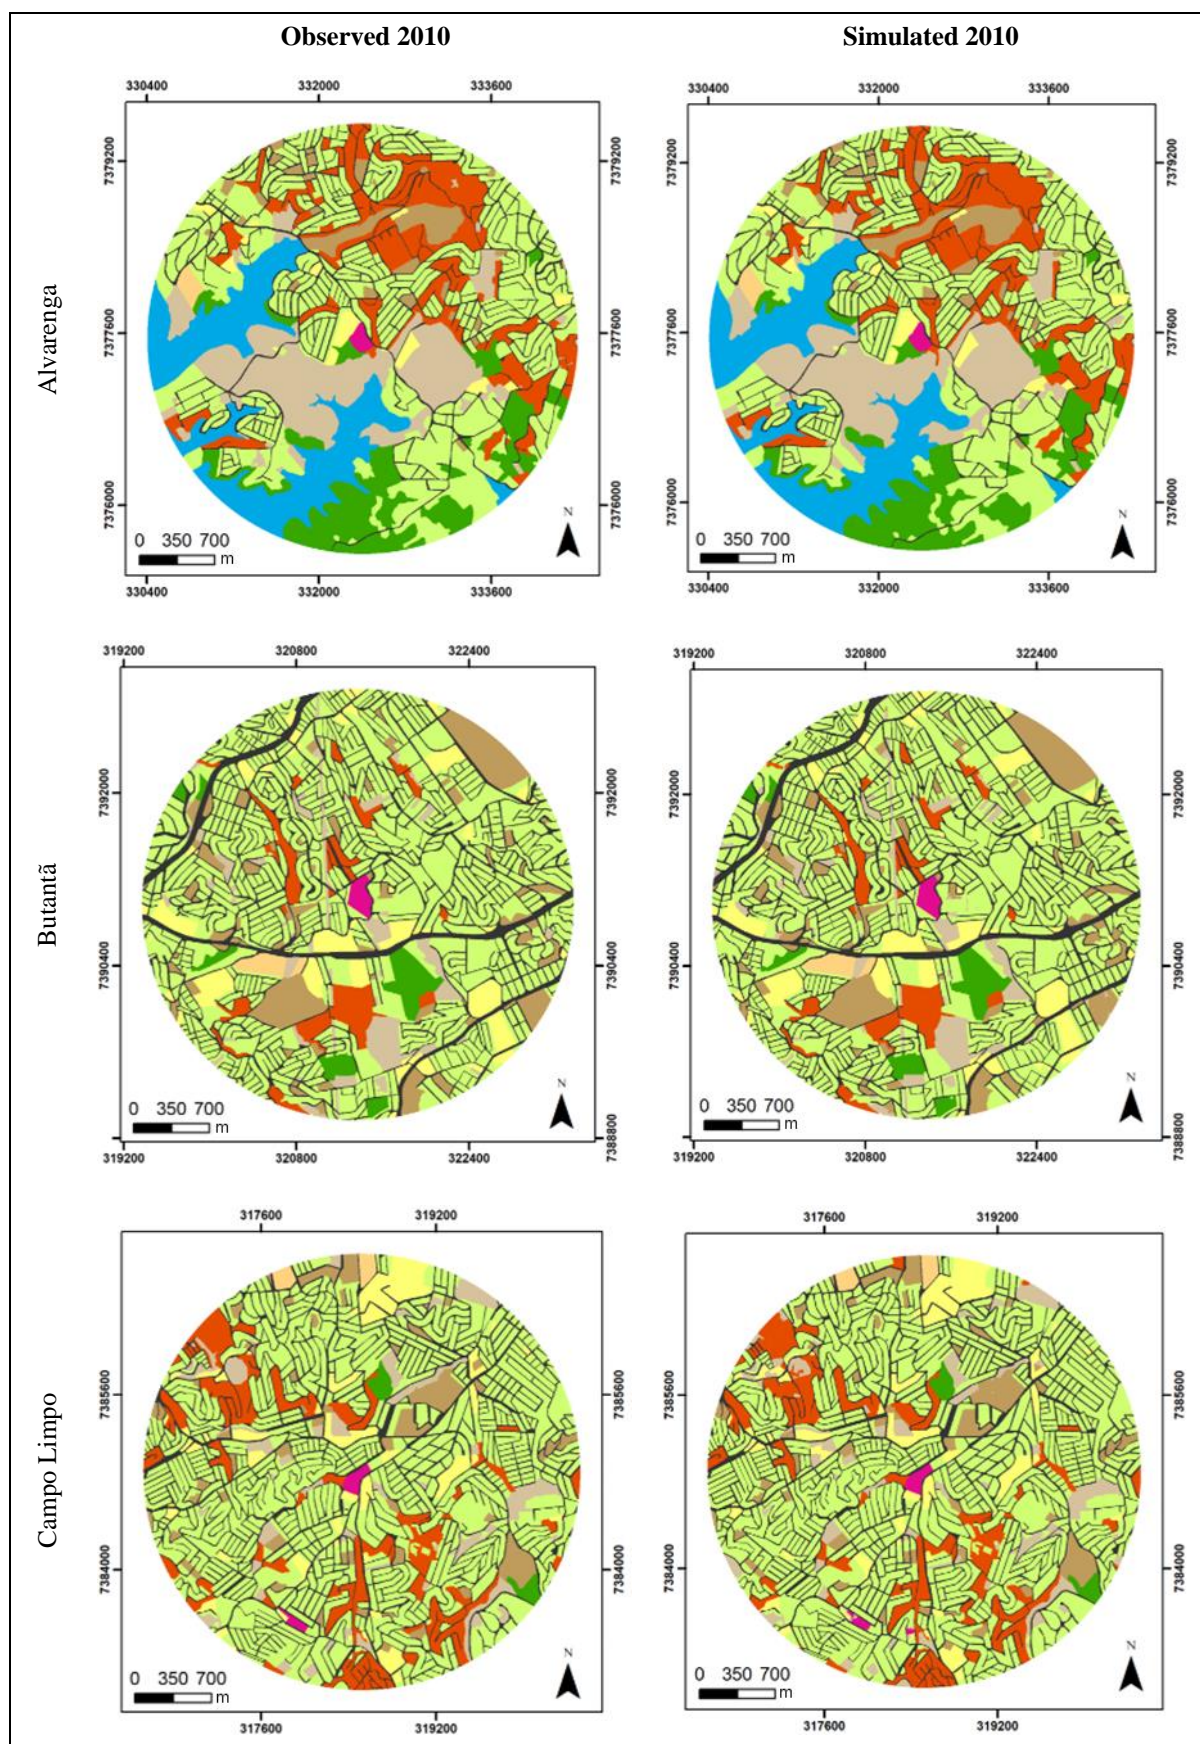



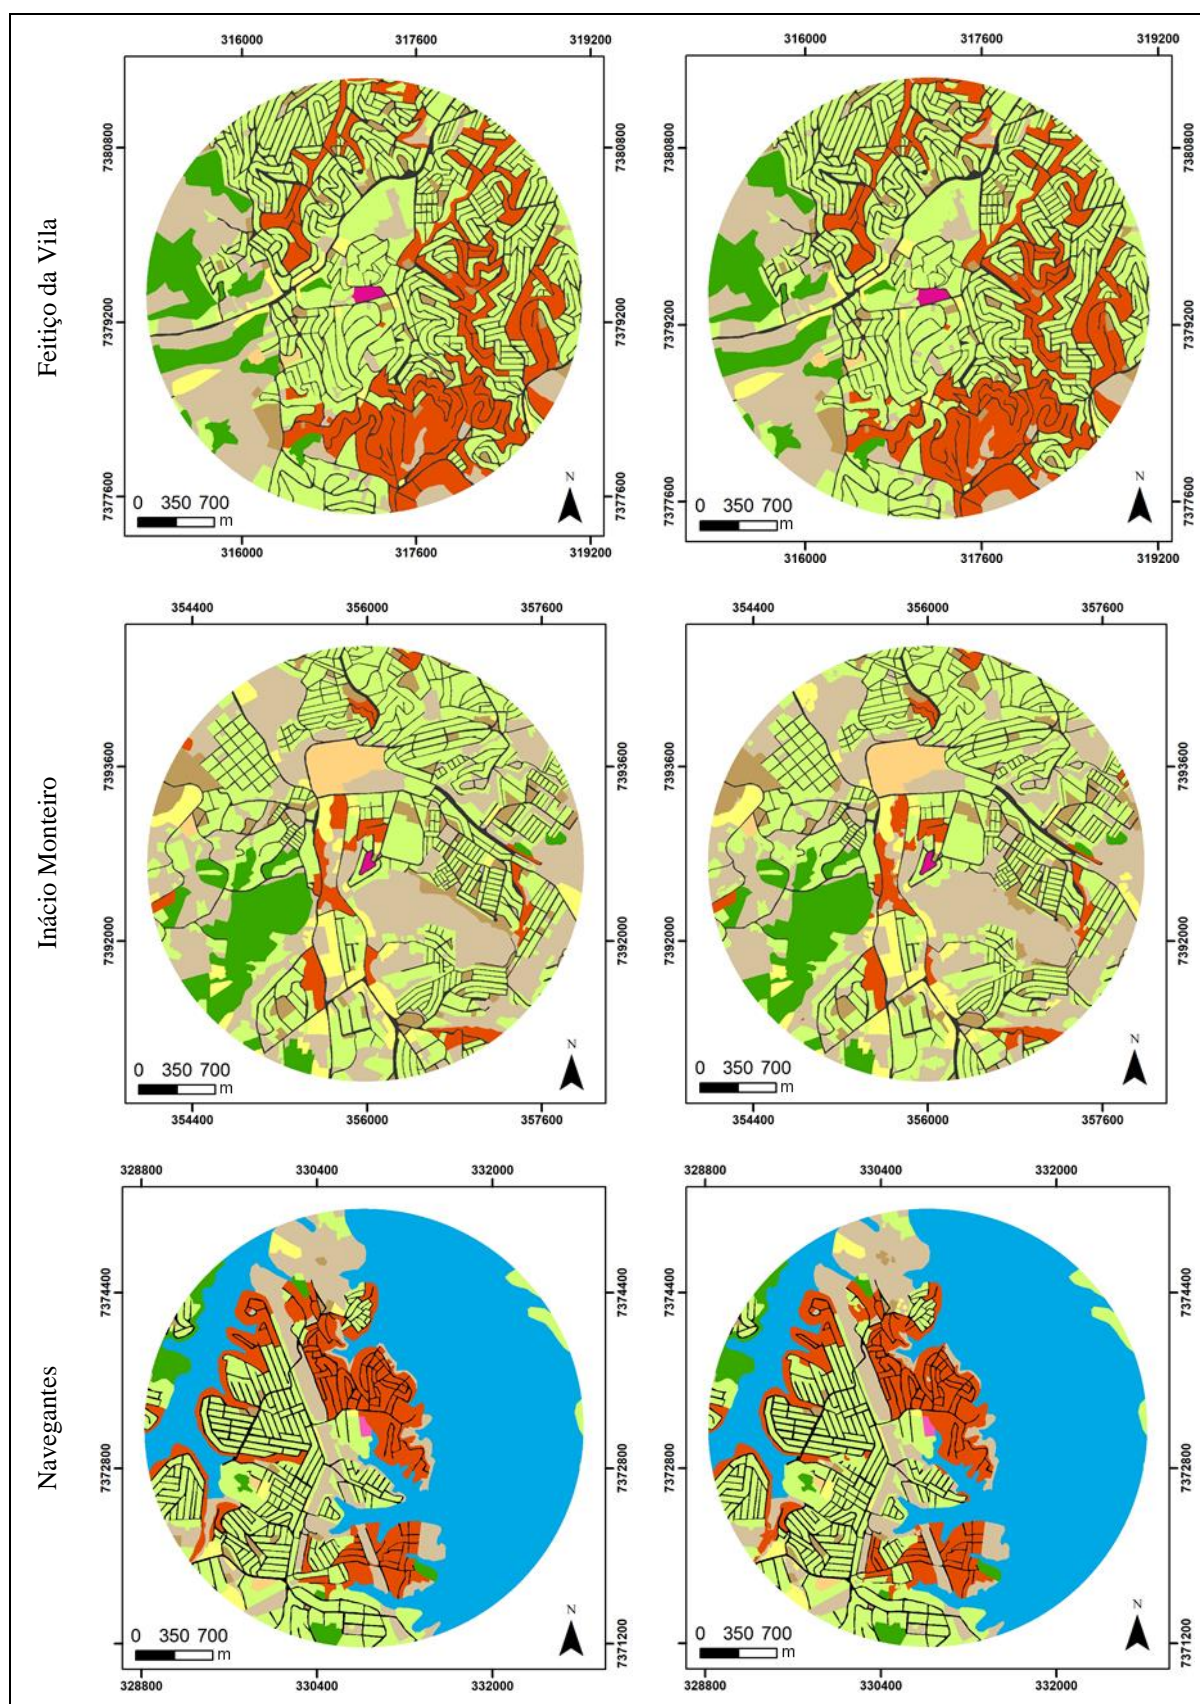

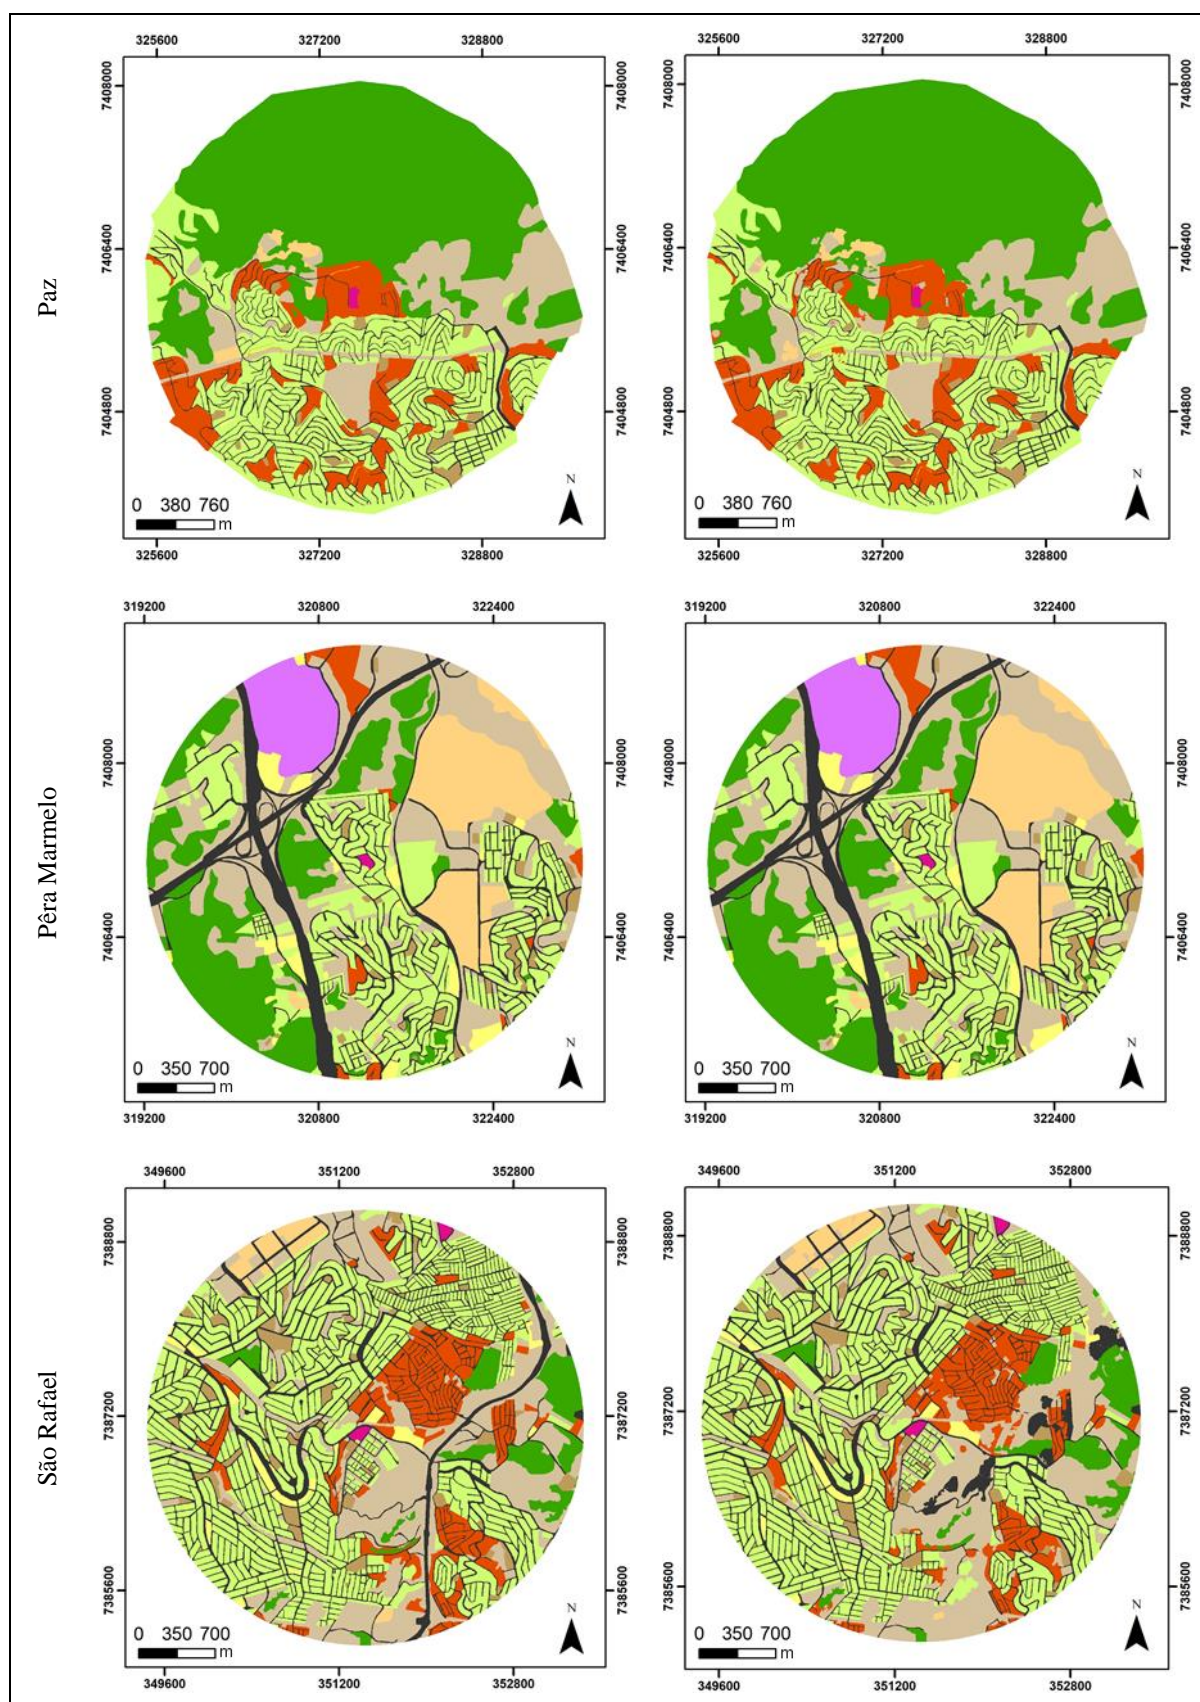



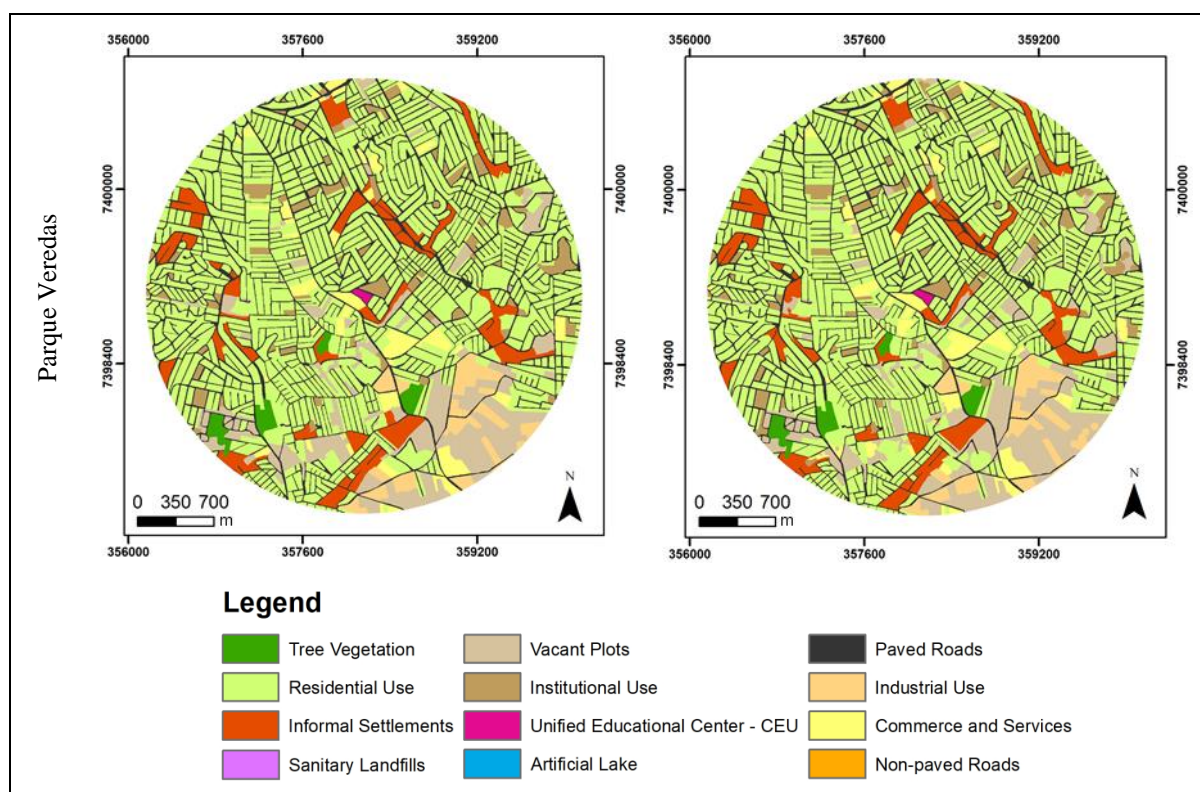

### Supplementary Material: Synthesis Tables

**Table S11.** Percentage of transitions to informal settlements in the 1st simulation period for all CEUs.

| Models              | 0 – 500 m |               | 501 – 1000 m |               | 1001 – 1500 m |               | 1501 – 2000 m |               |
|---------------------|-----------|---------------|--------------|---------------|---------------|---------------|---------------|---------------|
|                     | Area      | Nº of Patches | Area         | Nº of Patches | Area          | Nº of Patches | Area          | Nº of Patches |
| CEU Alvarenga*      | -         | -             | -            | -             | -             | -             | -             | -             |
| CEU Butantã         | 23.7%     | 50.0%         | 0.0%         | 0.0%          | 0.0%          | 0.0%          | 76.3%         | 50.0%         |
| CEU Campo Limpo     | 0.0%      | 0.0%          | 100.0%       | 100.0%        | 0.0%          | 0.0%          | 0.0%          | 0.0%          |
| CEU Feição da Vila  | 0.0%      | 0.0%          | 4.9%         | 33.3%         | 54.7%         | 41.7%         | 40.4%         | 25.0%         |
| CEU Inácio Monteiro | 0.0%      | 0.0%          | 0.0%         | 0.0%          | 0.0%          | 0.0%          | 100.0%        | 100.0%        |
| CEU Navegantes      | 82.3%     | 33.3%         | 17.7%        | 66.7%         | 0.0%          | 0.0%          | 0.0%          | 0.0%          |
| CEU Pêra Mar-melo   | 0.0%      | 0.0%          | 0.0%         | 0.0%          | 0.4%          | 73.7%         | 99.6%         | 26.3%         |
| CEU São Rafael      | 16.4%     | 7.7%          | 15.3%        | 23.1%         | 53.7%         | 30.8%         | 14.5%         | 38.5%         |
| CEU Parque Veredas  | 0.0%      | 0.0%          | 0.0%         | 0.0%          | 100.0%        | 100.0%        | 0.0%          | 0.0%          |
| CEU Paz             | 55.1%     | 58.3%         | 5.4%         | 8.3%          | 31.2%         | 16.7%         | 8.3%          | 16.7%         |

\* No transition of this type occurred in the catchment area of this CEU.



**Table S12.** Percentage of transitions to informal settlements in the 2nd simulation period for all CEUs.

| Models               | 0 – 500 m |               | 501 – 1000 m |               | 1001 – 1500 m |               | 1501 – 2000 m |               |
|----------------------|-----------|---------------|--------------|---------------|---------------|---------------|---------------|---------------|
|                      | Area      | Nº of Patches | Area         | Nº of Patches | Area          | Nº of Patches | Area          | Nº of Patches |
| CEU Alvarenga        | 22.3%     | 11.8%         | 0.0%         | 0.0%          | 51.8%         | 58.8%         | 25.9%         | 29.4%         |
| CEU Butantã          | 0.0%      | 0.0%          | 0.0%         | 0.0%          | 0.0%          | 0.0%          | 100.0%        | 100.0%        |
| CEU Campo Limpo      | 0.0%      | 0.0%          | 0.0%         | 0.0%          | 14.0%         | 23.1%         | 86.0%         | 76.9%         |
| CEU Feitiço da Vila* | -         | -             | -            | -             | -             | -             | -             | -             |
| CEU Inácio Monteiro  | 82.6%     | 88.9%         | 17.4%        | 11.1%         | 0.0%          | 0.0%          | 0.0%          | 0.0%          |
| CEU Navegantes       | 0.0%      | 0.0%          | 0.0%         | 0.0%          | 60.0%         | 16.7%         | 40.0%         | 83.3%         |
| CEU Pêra Marmelo     | 0.0%      | 0.0%          | 0.0%         | 0.0%          | 0.0%          | 0.0%          | 100.0%        | 100.0%        |
| CEU São Rafael       | 37.3%     | 24.3%         | 25.5%        | 24.3%         | 28.4%         | 43.2%         | 8.9%          | 8.1%          |
| CEU Parque Veredas   | 12.1%     | 21.4%         | 4.7%         | 14.3%         | 72.9%         | 57.1%         | 10.3%         | 7.1%          |
| CEU Paz              | 72.6%     | 55.2%         | 27.4%        | 44.8%         | 0.0%          | 0.0%          | 0.0%          | 0.0%          |

\* No transition of this type occurred in the catchment area of this CEU.

**Table S13.** Percentage of informal settlements removal or urbanization (regularization) in the 1st simulation period for all CEUs.

| Models               | 0 – 500 m |               | 501 – 1000 m |               | 1001 – 1500 m |               | 1501 – 2000 m |               |
|----------------------|-----------|---------------|--------------|---------------|---------------|---------------|---------------|---------------|
|                      | Area      | Nº of Patches | Area         | Nº of Patches | Area          | Nº of Patches | Area          | Nº of Patches |
| CEU Alvarenga*       | -         | -             | -            | -             | -             | -             | -             | -             |
| CEU Butantã          | 0.0%      | 0.0%          | 0.3%         | 14.3%         | 0.0%          | 0.0%          | 99.7%         | 85.7%         |
| CEU Campo Limpo*     | -         | -             | -            | -             | -             | -             | -             | -             |
| CEU Feitiço da Vila  | 0.0%      | 0.0%          | 59.0%        | 70.0%         | 41.0%         | 30.0%         | 0.0%          | 0.0%          |
| CEU Inácio Monteiro* | -         | -             | -            | -             | -             | -             | -             | -             |
| CEU Navegantes*      | -         | -             | -            | -             | -             | -             | -             | -             |
| CEU Pêra Marmelo     | 71.2%     | 11.1%         | 19.1%        | 11.1%         | 9.8%          | 77.8%         | 0.0%          | 0.0%          |
| CEU São Rafael*      | -         | -             | -            | -             | -             | -             | -             | -             |
| CEU Parque Veredas   | 0.0%      | 0.0%          | 100.0%       | 100.0%        | 0.0%          | 0.0%          | 0.0%          | 0.0%          |
| CEU Paz              | 0.0%      | 0.0%          | 0.0%         | 0.0%          | 79.9%         | 71.4%         | 20.1%         | 28.6%         |

Informal Settlements removal concerns the transition to Vacant Plots.

Informal Settlements regularization or formalization concerns to formal Residential Use.

\* No transition of this type occurred in the catchment area of this CEU.

**Table S14.** Percentage of informal settlements removal or urbanization (regularization) in the 2nd simulation period for all CEUs.

| Models              | 0 – 500 m |               | 501 – 1000 m |               | 1001 – 1500 m |               | 1501 – 2000 m |               |
|---------------------|-----------|---------------|--------------|---------------|---------------|---------------|---------------|---------------|
|                     | Area      | Nº of Patches | Area         | Nº of Patches | Area          | Nº of Patches | Area          | Nº of Patches |
| CEU Alvarenga*      | -         | -             | -            | -             | -             | -             | -             | -             |
| CEU Butantã         | 40.9%     | 83.3%         | 0.1%         | 8.3%          | 59.0%         | 8.3%          | 0.0%          | 0.0%          |
| CEU Campo Limpo     | 0.0%      | 0.0%          | 66.5%        | 13.3%         | 33.5%         | 86.7%         | 0.0%          | 0.0%          |
| CEU Feição da Vila  | 0.0%      | 0.0%          | 53.6%        | 31.4%         | 41.0%         | 64.7%         | 5.5%          | 3.9%          |
| CEU Inácio Monteiro | 23.3%     | 14.8%         | 26.9%        | 11.1%         | 4.3%          | 37.0%         | 45.4%         | 37.0%         |
| CEU Navegantes      | 26.6%     | 45.5%         | 40.1%        | 36.4%         | 33.3%         | 18.2%         | 0.0%          | 0.0%          |
| CEU Pêra Marmelo    | 0.0%      | 0.0%          | 0.0%         | 0.0%          | 42.4%         | 54.8%         | 57.6%         | 45.2%         |
| CEU São Rafael      | 0.0%      | 0.0%          | 56.5%        | 50.0%         | 43.5%         | 50.0%         | 0.0%          | 0.0%          |
| CEU Parque Veredas  | 0.0%      | 0.0%          | 0.0%         | 0.0%          | 51.9%         | 73.3%         | 48.1%         | 26.7%         |
| CEU Paz             | 0.0%      | 0.0%          | 41.6%        | 36.4%         | 49.3%         | 54.5%         | 9.1%          | 9.1%          |

Informal Settlements removal concerns the transition to Vacant Plots.

Informal Settlements regularization or formalization concerns to formal Residential Use.

\* No transition of this type occurred in the catchment area of this CEU.

**Table S15.** Percentage of transitions to the formal residential use in the 1st simulation period for all CEUs.

| Models              | 0 – 500 m |               | 501 – 1000 m |               | 1001 – 1500 m |        | 1501 – 2000 m |       |
|---------------------|-----------|---------------|--------------|---------------|---------------|--------|---------------|-------|
|                     | Area      | Nº of Patches | Area         | Nº of Patches | Área          | Area   | Nº of Patches | Area  |
| CEU Alvarenga       | 0.0%      | 0.0%          | 9.2%         | 33.3%         | 90.8%         | 66.7%  | 0.0%          | 0.0%  |
| CEU Butantã         | 0.0%      | 0.0%          | 0.0%         | 0.0%          | 100.0%        | 100.0% | 0.0%          | 0.0%  |
| CEU Campo Limpo     | 0.2%      | 12.5%         | 24.5%        | 37.5%         | 0.0%          | 0.0%   | 75.3%         | 50.0% |
| CEU Feição da Vila  | 37.4%     | 20.0%         | 62.6%        | 80.0%         | 0.0%          | 0.0%   | 0.0%          | 0.0%  |
| CEU Inácio Monteiro | 0.0%      | 0.0%          | 23.6%        | 11.8%         | 41.4%         | 35.3%  | 35.0%         | 52.9% |
| CEU Navegantes*     | -         | -             | -            | -             | -             | -      | -             | -     |
| CEU Pêra Marmelo    | 32.8%     | 10.0%         | 29.9%        | 20.0%         | 21.8%         | 45.0%  | 15.4%         | 25.0% |
| CEU São Rafael      | 0.0%      | 0.0%          | 3.3%         | 16.7%         | 96.7%         | 83.3%  | 0.0%          | 0.0%  |
| CEU Parque Veredas  | 22.3%     | 17.6%         | 51.2%        | 52.9%         | 26.5%         | 29.4%  | 0.0%          | 0.0%  |
| CEU Paz             | 0.0%      | 0.0%          | 0.0%         | 0.0%          | 79.9%         | 71.4%  | 20.1%         | 28.6% |

\* No transition of this type occurred in the catchment area of this CEU.

**Table S16.** Percentage of transitions to the formal residential use in the 2nd simulation period for all CEUs.

| Models              | 0 – 500 m |               | 501 – 1000 m |               | 1001 – 1500 m |       | 1501 – 2000 m |       |
|---------------------|-----------|---------------|--------------|---------------|---------------|-------|---------------|-------|
|                     | Area      | Nº of Patches | Area         | Nº of Patches | Área          | Area  | Nº of Patches | Area  |
| CEU Alvarenga       | 0.0%      | 0.0%          | 0.0%         | 0.0%          | 96.8%         | 71.4% | 3.2%          | 28.6% |
| CEU Butantã         | 9.6%      | 10.7%         | 19.0%        | 10.7%         | 54.0%         | 60.7% | 17.4%         | 17.9% |
| CEU Campo Limpo     | 3.1%      | 6.7%          | 29.6%        | 26.7%         | 8.5%          | 26.7% | 58.8%         | 40.0% |
| CEU Feitiço da Vila | 9.0%      | 14.3%         | 57.2%        | 42.9%         | 28.7%         | 28.6% | 5.1%          | 14.3% |
| CEU Inácio Monteiro | 9.0%      | 8.3%          | 9.0%         | 11.1%         | 23.3%         | 22.2% | 58.7%         | 58.3% |
| CEU Navegantes      | 0.0%      | 0.0%          | 36.4%        | 14.3%         | 63.6%         | 85.7% | 0.0%          | 0.0%  |
| CEU Pêra Mar-melo   | 62.0%     | 40.0%         | 6.9%         | 20.0%         | 15.7%         | 26.7% | 15.4%         | 13.3% |
| CEU São Rafael      | 3.4%      | 13.3%         | 49.1%        | 46.7%         | 30.2%         | 33.3% | 17.3%         | 6.7%  |
| CEU Parque Veredas  | 0.0%      | 0.0%          | 44.8%        | 23.8%         | 45.6%         | 61.9% | 9.6%          | 14.3% |
| CEU Paz             | 0.0%      | 0.0%          | 39.6%        | 33.3%         | 2.0%          | 33.3% | 58.4%         | 33.3% |
